# Supplementary material for: New Molecular Approach for the Detection of Kinetoplastida Parasites of Medical and Veterinary Interest
Source: PubMed Central journal article supplement (PMC7143920; doi:10.3390/microorganisms8030356), 2020-03-02
Supplement: microorganisms-08-00356-s001.pdf [file microorganisms-08-00356-s001.pdf]

Supplementary Materials

# New molecular approach for the detection of Kinetoplastida parasites of medical and veterinary interest

Hacène Medkour <sup>1,2,3</sup>, Marie Varloud <sup>4</sup>, Bernard Davoust <sup>1,2</sup> and Oleg Mediannikov <sup>1,2,\*</sup>

<sup>1</sup> IHU Méditerranée Infection - Microbes, Evolution, Phylogeny and Infection (MEPI), 13385 Marseille Cedex 05, France; hacenevet1990@yahoo.fr (H.M.); bernard.davoust@gmail.com (B.D.)

<sup>2</sup> UMR Aix-Marseille Université, IRD, APHM -19-21, Bd Jean Moulin, 13385 Marseille Cedex 05, France

<sup>3</sup> PADESCA Laboratory, Veterinary Science Institute, University Constantine 1, 25100, El Khroub, Algeria

<sup>4</sup> CEVA Animal Health, Libourne, France; marie.varloud@ceva.com

\* Correspondence: olegusss1@gmail.com

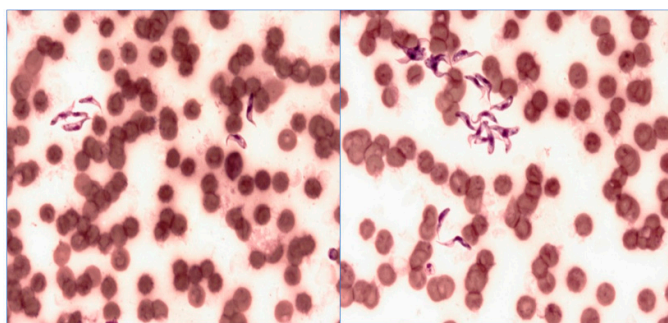

Figure S1: *Trypanosoma congolense* in a dog from Cote d'Ivoire; Microscopy G10X100; There were parasite/mL of blood

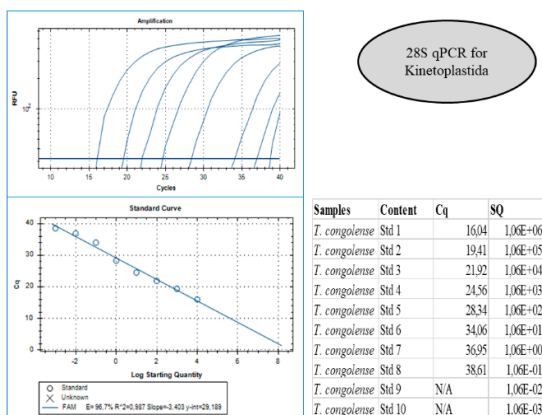

Figure S2: Standard curve and the detection limit for the TaqMan qPCR 28S LSU for Kinetoplastida

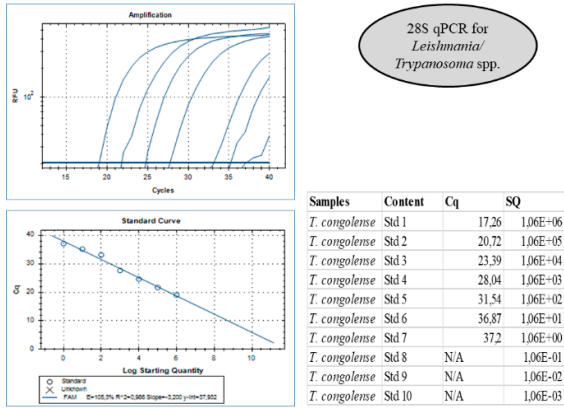

Figure S3: Standard curve and the detection limit for the TaqMan qPCR 28S LSU *Leishmania*/  
*Trypanosoma* spp.

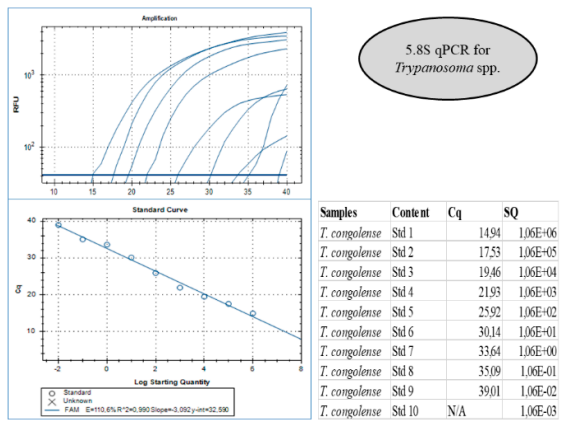

Figure S4: Standard curve and the detection limit for the TaqMan qPCR 5.8S rRNA for *Trypanosoma*  
spp.

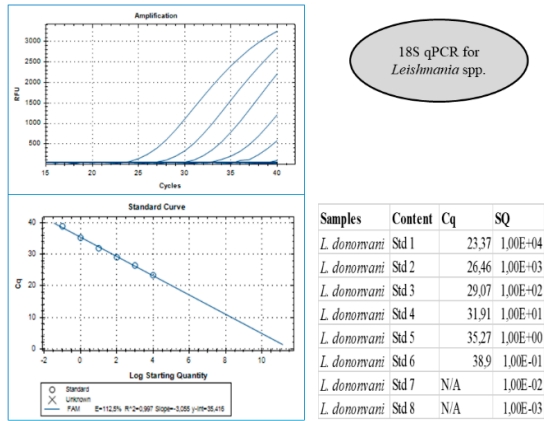

Figure S5: Standard curve and the detection limit for the TaqMan qPCR 18S SSU *Leishmania* spp.

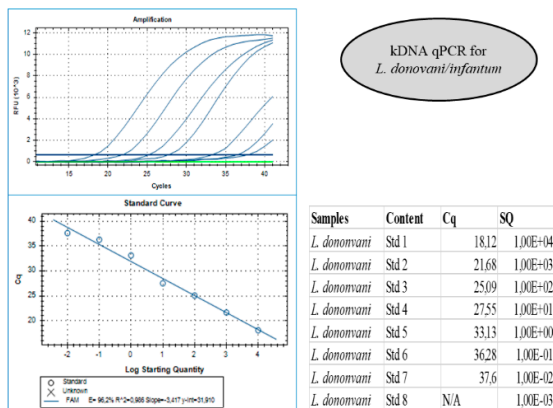

Figure S6: Standard curve and the detection limit for the TaqMan qPCR-kDNA for *Leishmania donovani* complex

**Table S1. Positive (\*) and negative control DNA used for sensitivity and specificity determination of designed oligonucleotides**

| N° | Organism | Name                                                    |
|----|----------|---------------------------------------------------------|
| 1  | Protozoa | <i>Leishmania infantum</i> *                            |
| 2  | Protozoa | <i>Leishmania major</i> *                               |
| 3  | Protozoa | <i>Leishmania donovani</i> *                            |
| 4  | Protozoa | <i>Leishmania guyanensis</i> *                          |
| 5  | Protozoa | <i>Trypanosoma evansi</i> *                             |
| 7  | Protozoa | <i>Trypanosoma brucei brucei</i> *                      |
| 8  | Protozoa | <i>Trypanosoma brucei gambiense</i>                     |
| 9  | Protozoa | <i>Trypanosoma brucei gambiense</i> biyamina groupe II* |
| 10 | Protozoa | <i>Trypanosoma congolense</i> IL 3000*                  |
| 12 | Protozoa | <i>Trypanosoma vivax</i> *                              |
| 14 | Protozoa | <i>Trypanosoma cruzi</i> CL Brunner*                    |

|    |           |                                                      |
|----|-----------|------------------------------------------------------|
| 15 | Protozoa  | <i>Trypanosoma cruzi</i> (Dog KIM)*                  |
| 16 | Protozoa  | <i>Leptomonas</i> spp. *                             |
| 17 | Bacteria  | <i>Rickettsia montanensis</i>                        |
| 18 | Lice      | Head lice ( <i>Pediculus humanus capitis</i> )       |
| 19 | Bacteria  | <i>Ehrlichia canis</i>                               |
| 20 | Bacteria  | <i>Coxiella burnetii</i>                             |
| 21 | Bacteria  | <i>Borrelia recurrentis</i>                          |
| 22 | Bacteria  | <i>Staphylococcus hominis</i>                        |
| 23 | Bacteria  | <i>Asaia bogorensis</i>                              |
| 24 | Piroplasm | <i>Babesia canis</i> (Moocky)                        |
| 25 | Bacteria  | <i>Haemophilus influenzae</i>                        |
| 27 | Bacteria  | <i>Asaia</i> C2                                      |
| 28 | Bacteria  | <i>Wolbachia</i> sp.                                 |
| 29 | Bacteria  | <i>Anaplasma phagocytophilum</i>                     |
| 30 | Bacteria  | <i>Enterobacter aerogenes</i>                        |
| 31 | Bacteria  | <i>Streptococcus pneumoniae</i>                      |
| 32 | Bacteria  | <i>Salmonella enterica</i>                           |
| 33 | Bacteria  | <i>Citrobacter koseri</i>                            |
| 34 | Bacteria  | <i>Gardnerella vaginalis</i>                         |
| 35 | Bacteria  | <i>Streptococcus pyogenes</i>                        |
| 36 | Protozoa  | <i>Plasmodium</i> sp.                                |
| 37 | Bacteria  | <i>Rickettsia typhi</i>                              |
| 38 | Bacteria  | <i>Enterococcus faecium</i>                          |
| 39 | Bacteria  | <i>Streptococcus agalactiae</i>                      |
| 40 | Bacteria  | <i>Rickettsia conorii</i>                            |
| 41 | Tick      | <i>Rhipicephalus microplus</i>                       |
| 42 | Bovine    | BA286 cell line                                      |
| 43 | Dog       | DH62 cell line                                       |
| 44 | Human     | HL60 cell line ( <i>Homo sapiens</i> )               |
| 45 | Donkey    | ANE 4 ( <i>Equus asinus</i> )                        |
| 46 | Horse     | CV.G 22 ( <i>Equus caballus</i> )                    |
| 47 | Flea      | <i>Ctenocephalides felis</i>                         |
| 48 | Bedbugs   | <i>Cimex lectularius</i>                             |
| 49 | Tick      | <i>Hyalomma marginatum</i>                           |
| 50 | Tick      | <i>Amblyomma variegatum</i>                          |
| 51 | Dog       | DH62 dog cell line ( <i>Canis lupus familiaris</i> ) |
| 52 | Protozoa  | <i>Hepatozoon canis</i>                              |
| 53 | Protozoa  | <i>Leptomonas saimouri</i>                           |
| 54 | Piroplasm | <i>Theileria equi</i>                                |
| 55 | Bacteria  | <i>Rickettsia massiliae</i>                          |
| 56 | Bacteria  | <i>Staphylococcus haemolyticus</i>                   |
| 57 | Bacteria  | <i>Staphylococcus aureus</i>                         |
| 58 | Bacteria  | <i>Rickettsia felis</i>                              |
| 59 | Bacteria  | <i>Stenotrophomonas maltophilia</i>                  |
| 60 | Bacteria  | <i>Acinetobacter</i> sp.                             |
| 61 | Bacteria  | <i>Enterobacter aerogenes</i>                        |

**Table S2.** Ct values repeatability and reproducibility of the real time qPCR assays.

| <i>L. donovani</i> load | kDNA <i>Leishmania donovani</i> complex qPCR |             |        |      |      |        | Intra assay variations of Ct values |       |      |      |        | Inter assay variations of Ct values |       |      |      |      |
|-------------------------|----------------------------------------------|-------------|--------|------|------|--------|-------------------------------------|-------|------|------|--------|-------------------------------------|-------|------|------|------|
|                         | Replicate 1                                  | Replicate 2 | Mean   | SD   | CV % | Assay  | Assay                               |       | Mean | SD   | CV %   | Assay                               | Assay | Mean | SD   | CV % |
|                         |                                              |             |        |      |      |        | 1                                   | 2     |      |      |        |                                     |       |      |      |      |
| 1,00E+04                | 18,12                                        | 17,88       | 18     | 0,17 | 0,94 | 18     | 18,66                               | 18,33 | 0,47 | 2,55 | 18     | 18,66                               | 18,33 | 0,47 | 2,55 |      |
| 1,00E+03                | 21,68                                        | 21,36       | 21,52  | 0,23 | 1,05 | 21,52  | 21,22                               | 21,37 | 0,21 | 0,99 | 21,52  | 21,22                               | 21,37 | 0,21 | 0,99 |      |
| 1,00E+02                | 25,09                                        | 24,9        | 24,995 | 0,13 | 0,54 | 24,995 | 23,99                               | 24,49 | 0,71 | 2,90 | 24,995 | 23,99                               | 24,49 | 0,71 | 2,90 |      |
| 1,00E+01                | 27,55                                        | 27,71       | 27,63  | 0,11 | 0,41 | 27,63  | 26,93                               | 27,28 | 0,49 | 1,81 | 27,63  | 26,93                               | 27,28 | 0,49 | 1,81 |      |
| 1,00E+00                | 33,13                                        | 33,01       | 33,07  | 0,08 | 0,26 | 33,07  | 33,41                               | 33,24 | 0,24 | 0,72 | 33,07  | 33,41                               | 33,24 | 0,24 | 0,72 |      |
| 1,00E-01                | 36,28                                        | 37,04       | 36,66  | 0,54 | 1,47 | 36,66  | 36,47                               | 36,57 | 0,13 | 0,37 | 36,66  | 36,47                               | 36,57 | 0,13 | 0,37 |      |

|          |      |       |        |      |      |        |       |       |      |      |
|----------|------|-------|--------|------|------|--------|-------|-------|------|------|
| 1,00E-02 | 37,6 | 37,99 | 37,795 | 0,28 | 0,73 | 37,795 | 38,11 | 37,95 | 0,22 | 0,59 |
| 1,00E-03 | -    | -     | -      | -    | -    | -      | -     | -     | -    | -    |

### 18S *Leishmania* spp. qPCR

| <i>L. donovani</i> load | Intra assay variations of Ct values |             |        |      |      |        | Inter assay variations of Ct values |       |      |      |  |
|-------------------------|-------------------------------------|-------------|--------|------|------|--------|-------------------------------------|-------|------|------|--|
|                         | Replicate 1                         | Replicate 2 | Mean   | SD   | CV % | Assay  |                                     | Mean  | SD   | CV % |  |
|                         |                                     |             |        |      |      | 1      | 2                                   |       |      |      |  |
| 1,00E+04                | 23,37                               | 22,98       | 23,175 | 0,28 | 1,19 | 23,175 | 22,84                               | 23,01 | 0,24 | 1,03 |  |
| 1,00E+03                | 26,46                               | 25,89       | 26,175 | 0,40 | 1,54 | 26,175 | 26,33                               | 26,25 | 0,11 | 0,42 |  |
| 1,00E+02                | 29,07                               | 28,94       | 29,005 | 0,09 | 0,32 | 29,005 | 29,09                               | 29,05 | 0,06 | 0,21 |  |
| 1,00E+01                | 31,91                               | 32,01       | 31,96  | 0,07 | 0,22 | 31,96  | 31,07                               | 31,52 | 0,63 | 2,00 |  |
| 1,00E+00                | 35,27                               | 36          | 35,635 | 0,52 | 1,45 | 35,635 | 38,65                               | 37,14 | 2,13 | 5,74 |  |
| 1,00E-01                | 38,9                                | 39,44       | 39,17  | 0,38 | 0,97 | 39,17  | 39,82                               | 39,50 | 0,46 | 1,16 |  |
| 1,00E-02                | -                                   | -           | -      | -    | -    | -      | -                                   | -     | -    | -    |  |
| 1,00E-03                | -                                   | -           | -      | -    | -    | -      | -                                   | -     | -    | -    |  |

### 5.8S *Trypanosoma* spp. qPCR

| <i>T. congolense</i> load | Intra assay variations of Ct values |             |        |      |      |        | Inter assay variations of Ct values |       |      |      |  |
|---------------------------|-------------------------------------|-------------|--------|------|------|--------|-------------------------------------|-------|------|------|--|
|                           | Replicate 1                         | Replicate 2 | Mean   | SD   | CV % | Assay  |                                     | Mean  | SD   | CV % |  |
|                           |                                     |             |        |      |      | 1      | 2                                   |       |      |      |  |
| 1,06E+06                  | 14,94                               | 15,34       | 15,14  | 0,28 | 1,87 | 15,14  | 16,12                               | 15,63 | 0,69 | 4,43 |  |
| 1,06E+05                  | 17,53                               | 18,89       | 18,21  | 0,96 | 5,28 | 18,21  | 20,31                               | 19,26 | 1,48 | 7,71 |  |
| 1,06E+04                  | 19,46                               | 20,43       | 19,945 | 0,69 | 3,44 | 19,945 | 22,21                               | 21,08 | 1,60 | 7,60 |  |
| 1,06E+03                  | 21,93                               | 22,76       | 22,345 | 0,59 | 2,63 | 22,345 | 25,31                               | 23,83 | 2,10 | 8,80 |  |
| 1,06E+02                  | 25,92                               | 26,33       | 26,125 | 0,29 | 1,11 | 26,125 | 27,96                               | 27,04 | 1,30 | 4,80 |  |
| 1,06E+01                  | 30,14                               | 31          | 30,57  | 0,61 | 1,99 | 30,57  | 29,88                               | 30,23 | 0,49 | 1,61 |  |
| 1,06E+00                  | 33,64                               | 3,36E+01    | 33,6   | 0,06 | 0,17 | 33,6   | 32,64                               | 33,12 | 0,68 | 2,05 |  |
| 1,06E-01                  | 35,09                               | 36,21       | 35,65  | 0,79 | 2,22 | 35,65  | 34,11                               | 34,88 | 1,09 | 3,12 |  |
| 1,06E-02                  | 39,01                               | 39,14       | 39,075 | 0,09 | 0,24 | 39,075 | 38,39                               | 38,73 | 0,48 | 1,25 |  |
| 1,06E-03                  | -                                   | -           | -      | -    | -    | -      | -                                   | -     | -    | -    |  |

### 28S *Leishmania/Trypanosoma* spp. qPCR

| <i>T. congolense</i> load | Intra assay variations of Ct values |             |        |      |      |        | Inter assay variations of Ct values |       |      |      |  |
|---------------------------|-------------------------------------|-------------|--------|------|------|--------|-------------------------------------|-------|------|------|--|
|                           | Replicate 1                         | Replicate 2 | Mean   | SD   | CV % | Assay  |                                     | Mean  | SD   | CV % |  |
|                           |                                     |             |        |      |      | 1      | 2                                   |       |      |      |  |
| 1,06E+06                  | 17,26                               | 18,56       | 17,91  | 0,92 | 5,13 | 17,91  | 18,19                               | 18,05 | 0,20 | 1,10 |  |
| 1,06E+05                  | 20,72                               | 22          | 21,36  | 0,91 | 4,24 | 21,36  | 22,3                                | 21,83 | 0,66 | 3,04 |  |
| 1,06E+04                  | 23,39                               | 23,96       | 23,675 | 0,40 | 1,70 | 23,675 | 23,55                               | 23,61 | 0,09 | 0,37 |  |
| 1,06E+03                  | 28,04                               | 29,14       | 28,59  | 0,78 | 2,72 | 28,59  | 30                                  | 29,30 | 1,00 | 3,40 |  |
| 1,06E+02                  | 31,54                               | 32,66       | 32,1   | 0,79 | 2,47 | 32,1   | 33,33                               | 32,72 | 0,87 | 2,66 |  |
| 1,06E+01                  | 36,87                               | 37,8        | 37,335 | 0,66 | 1,76 | 37,335 | 38,09                               | 37,71 | 0,53 | 1,42 |  |
| 1,06E+00                  | 37,2                                | 38,33       | 37,765 | 0,80 | 2,12 | 37,765 | 39,34                               | 38,55 | 1,11 | 2,89 |  |
| 1,06E-01                  | -                                   | -           | -      | -    | -    | -      | -                                   | -     | -    | -    |  |
| 1,06E-02                  | -                                   | -           | -      | -    | -    | -      | -                                   | -     | -    | -    |  |
| 1,06E-03                  | -                                   | -           | -      | -    | -    | -      | -                                   | -     | -    | -    |  |

### 28S Kinetoplastida spp. qPCR

| <i>T. congolense</i> load | Intra assay variations of Ct values |             |        |      |      |        | Inter assay variations of Ct values |       |      |      |  |
|---------------------------|-------------------------------------|-------------|--------|------|------|--------|-------------------------------------|-------|------|------|--|
|                           | Replicate 1                         | Replicate 2 | Mean   | SD   | CV % | Assay  |                                     | Mean  | SD   | CV % |  |
|                           |                                     |             |        |      |      | 1      | 2                                   |       |      |      |  |
| 1,06E+06                  | 16,04                               | 15,68       | 15,86  | 0,25 | 1,61 | 15,86  | 16,51                               | 16,19 | 0,46 | 2,84 |  |
| 1,06E+05                  | 19,41                               | 18,9        | 19,155 | 0,36 | 1,88 | 19,155 | 18,58                               | 18,87 | 0,41 | 2,15 |  |

|          |       |       |        |      |      |        |       |       |      |      |
|----------|-------|-------|--------|------|------|--------|-------|-------|------|------|
| 1,06E+04 | 21,92 | 21,04 | 21,48  | 0,62 | 2,90 | 21,48  | 22,04 | 21,76 | 0,40 | 1,82 |
| 1,06E+03 | 24,56 | 23,95 | 24,255 | 0,43 | 1,78 | 24,255 | 27,65 | 25,95 | 2,40 | 9,25 |
| 1,06E+02 | 28,34 | 28    | 28,17  | 0,24 | 0,85 | 28,17  | 27,9  | 28,04 | 0,19 | 0,68 |
| 1,06E+01 | 34,06 | 32,47 | 33,265 | 1,12 | 3,38 | 33,265 | 30,14 | 31,70 | 2,21 | 6,97 |
| 1,06E+00 | 36,95 | 35,11 | 36,03  | 1,30 | 3,61 | 36,03  | 31,69 | 33,86 | 3,07 | 9,06 |
| 1,06E-01 | 38,61 | 37,78 | 38,195 | 0,59 | 1,54 | 38,195 | 33,21 | 35,70 | 3,52 | 9,87 |
| 1,06E-02 |       | 39,5  | 39,5   | -    | -    | 39,5   | 38,43 | 38,97 | 0,76 | 1,94 |
| 1,06E-03 | -     | -     | -      | -    | -    | -      | -     | -     | -    | -    |

**Table S3.** Individual results for samples screened by the qPCR tools and typing.

| Sample's ID | Species | Country       | 28 S Kineto | 28 S Leish- Tryp | 5.8S Tryp | 18S Leish | kDNA L. dono Cplx | kDNA L. inf | Typing                         |
|-------------|---------|---------------|-------------|------------------|-----------|-----------|-------------------|-------------|--------------------------------|
| 1           | Dog     | Algeria       | +           | +                | -         | +         | +                 | +           | <i>L. infantum</i>             |
| 2           | Dog     | Algeria       | +           | +                | -         | -         | -                 | -           | -                              |
| 3           | Dog     | Algeria       | +           | -                | -         | -         | -                 | -           | -                              |
| 3           | Dog     | Algeria       | +           | -                | -         | -         | -                 | -           | <i>B. caudatus</i>             |
| 4           | Dog     | Algeria       | +           | -                | -         | -         | -                 | -           | <i>B. caudatus</i>             |
| 5           | Dog     | Algeria       | +           | -                | -         | -         | -                 | -           | <i>B. caudatus</i>             |
| 6           | Dog     | Algeria       | +           | -                | -         | -         | -                 | -           | -                              |
| 7           | Dog     | Algeria       | -           | +                | -         | -         | -                 | -           | -                              |
| 8           | Dog     | Algeria       | +           | -                | -         | -         | -                 | -           | -                              |
| 9           | Dog     | Algeria       | +           | -                | -         | -         | -                 | -           | -                              |
| 10          | Dog     | Algeria       | +           | +                | -         | -         | -                 | -           | -                              |
| 11          | Dog     | Algeria       | -           | +                | -         | +         | +                 | +           | <i>L. infantum</i>             |
| 12          | Dog     | Algeria       | +           | +                | -         | -         | +                 | +           | <i>L. infantum</i>             |
| 13          | Dog     | Algeria       | +           | -                | -         | -         | +                 | +           | <i>L. infantum</i>             |
| 14          | Dog     | Algeria       | +           | +                | +         | -         | -                 | -           | <i>T. evansi</i>               |
| 15          | Dog     | Algeria       | -           | +                | -         | -         | -                 | -           | -                              |
| 16          | Dog     | Algeria       | +           | +                | +         | -         | -                 | -           | <i>T. evansi</i>               |
| 17          | Dog     | Algeria       | +           | +                | +         | -         | -                 | -           | <i>T. evansi</i>               |
| S1          | Dog     | Algeria       | +           | -                | -         | -         | -                 | -           | -                              |
| S11         | Dog     | Algeria       | +           | -                | -         | +         | +                 | +           | <i>L. infantum</i>             |
| S14         | Dog     | Algeria       | +           | +                | +         | -         | -                 | -           | <i>T. congolense</i>           |
| S17         | Dog     | Algeria       | +           | +                | +         | -         | -                 | -           | <i>T. congolense</i>           |
| S26         | Dog     | Algeria       | +           | +                | -         | +         | +                 | -           | <i>L. donovani/L. infantum</i> |
| S27         | Dog     | Algeria       | +           | +                | -         | +         | +                 | +           | <i>L. donovani/L. infantum</i> |
| S33         | Dog     | Algeria       | +           | +                | -         | +         | +                 | +           | <i>L. infantum</i>             |
| S41         | Dog     | Algeria       | +           | +                | +         | -         | -                 | -           | <i>T. evansi</i>               |
| S49         | Dog     | Algeria       | +           | +                | +         | -         | -                 | -           | <i>T. evansi</i>               |
| S50         | Dog     | Algeria       | +           | +                | -         | +         | +                 | +           | <i>L. infantum</i>             |
| S54         | Dog     | Algeria       | +           | -                | -         | -         | +                 | +           | <i>L. infantum</i>             |
| S73         | Dog     | Algeria       | +           | +                | -         | -         | -                 | -           | No sequence                    |
| B5          | Dog     | Algeria       | +           | +                | +         | -         | -                 | -           | <i>T. evansi</i>               |
| B6          | Dog     | Algeria       | +           | +                | +         | -         | -                 | -           | <i>T. evansi</i>               |
| T3          | Dog     | Algeria       | +           | +                | -         | +         | +                 | +           | <i>L. donovani/L. infantum</i> |
| ANE         | Equid   | Algeria       | +           | +                | -         | +         | +                 | +           | <i>L. infantum</i>             |
| CHEVAL      | Equid   | Algeria       | +           | +                | -         | +         | +                 | +           | <i>L. infantum</i>             |
| CMT 21      | Dog     | French Guiana | +           | -                | -         | +         | +                 | +           | <i>L. infantum</i>             |
| CMT 72      | Dog     | French Guiana | +           | -                | -         | -         | -                 | -           | -                              |
| CMT 78      | Dog     | French Guiana | -           | +                | +         | -         | -                 | -           | No sequence                    |
| CMT 80      | Dog     | French Guiana | +           | +                | -         | +         | +                 | +           | <i>L. infantum</i>             |
| CMT 86      | Dog     | French Guiana | -           | +                | +         | -         | -                 | -           | No sequence                    |
| CMT 89      | Dog     | French Guiana | -           | -                | +         | -         | -                 | -           | No sequence                    |
| CMT 94      | Dog     | French Guiana | +           | -                | -         | -         | -                 | -           | No sequence                    |
| CMT 95      | Dog     | French Guiana | +           | +                | +         | +         | +                 | +           | <i>L. infantum</i>             |
| B2          | Monkey  | French Guiana | +           | +                | -         | +         | +                 | +           | <i>L. infantum</i>             |
| B6          | Monkey  | French Guiana | +           | +                | -         | +         | +                 | +           | <i>L. infantum</i>             |

|             |        |               |   |   |   |   |   |   |                                   |
|-------------|--------|---------------|---|---|---|---|---|---|-----------------------------------|
| <b>B8</b>   | Monkey | French Guiana | + | + | - | + | - | - | <i>L. guyanensis</i>              |
| <b>B9</b>   | Monkey | French Guiana | - | - | - | + | - | - | -                                 |
| <b>EA16</b> | Dog    | Cote d'Ivoire | - | - | + | - | - | - | <i>T. congolense</i>              |
| <b>EA33</b> | Dog    | Cote d'Ivoire | + | + | + | - | + | + | <i>T. congolense/ L. infantum</i> |
| <b>EA40</b> | Dog    | Cote d'Ivoire | + | + | + | + | + | - | -                                 |
| <b>EA56</b> | Dog    | Cote d'Ivoire | - | - | + | - | - | - | <i>T. congolense</i>              |
| <b>EA64</b> | Dog    | Cote d'Ivoire | + | + | + | + | + | + | <i>T. congolense/ L. infantum</i> |
| <b>EA79</b> | Dog    | Cote d'Ivoire | + | + | - | + | + | + | <i>L. infantum</i>                |
| <b>EA95</b> | Dog    | Cote d'Ivoire | + | + | - | + | + | + | <i>L. infantum</i>                |

No sequence: means PCR + but not sequence obtained
